# Supplementary material for: Vanadium-doped NiS2 porous nanospheres with high selectivity and stability for the electroreduction of nitrogen to ammonia
Source: Royal Society of Chemistry journal article supplement (doi:10.1039/d1qi00328c), 2021-01-01
Supplement: d1qi00328c1.pdf [file d1qi00328c1.pdf]

Supporting information for

## **Vanadium-Doped NiS<sub>2</sub> Porous Nanosphere with High Selectivity and Stability for Electroreduction of Nitrogen to Ammonia**

Mingzhu Zhao,<sup>†#</sup> Chengying Guo,<sup>†#</sup> Lingfeng Gao,<sup>\*†</sup> Xuan Kuang,<sup>†</sup> Hua Yang,<sup>‡</sup> Xiaojing Ma,<sup>†</sup> Chengqing Liu,<sup>†</sup> Xuejing Liu,<sup>\*†</sup> Xu Sun<sup>\*†</sup> and Qin Wei<sup>†</sup>

<sup>†</sup>Key Laboratory of Interfacial Reaction & Sensing Analysis in Universities of Shandong, School of Chemistry and Chemical Engineering, University of Jinan, Jinan 250022, Shandong, China.

<sup>‡</sup>Shandong Provincial Key Laboratory of Chemical Energy Storage and Novel Cell Technology, School of Chemistry and Chemical Engineering, Liaocheng University, Liaocheng, 252059, P. R. China.

<sup>#</sup>Mingzhu Zhao and Chengying Guo contributed equally to this work.

### **Table of contents**

|                                                                                                     |           |
|-----------------------------------------------------------------------------------------------------|-----------|
| <b>1. Material Characterizations</b> .....                                                          | <b>1</b>  |
| <b>2. XRD spectra of precursor</b> .....                                                            | <b>3</b>  |
| <b>3. XRD spectra of pure NiS<sub>2</sub></b> .....                                                 | <b>3</b>  |
| <b>4. XPS survey of V<sub>0.2</sub>Ni<sub>0.8</sub>S<sub>2</sub></b> .....                          | <b>4</b>  |
| <b>5. SEM image of precursor</b> .....                                                              | <b>4</b>  |
| <b>6. SEM images of pure NiS<sub>2</sub></b> .....                                                  | <b>5</b>  |
| <b>7. BET images of pure NiS<sub>2</sub> and V<sub>0.2</sub>Ni<sub>0.8</sub>S<sub>2</sub></b> ..... | <b>5</b>  |
| <b>8. EDS spectrum of V<sub>0.2</sub>Ni<sub>0.8</sub>S<sub>2</sub></b> .....                        | <b>6</b>  |
| <b>9. Gas-tight-compartment cell for NRR</b> .....                                                  | <b>6</b>  |
| <b>10. Standard curve of NH<sub>3</sub></b> .....                                                   | <b>6</b>  |
| <b>11. UV-vis absorption spectrums of all contrast experiments</b> .....                            | <b>7</b>  |
| <b>12. Standard curve of N<sub>2</sub>H<sub>4</sub></b> .....                                       | <b>7</b>  |
| <b>13. UV-vis absorption spectrum and corresponding N<sub>2</sub>H<sub>4</sub> yield</b> .....      | <b>8</b>  |
| <b>14. Electrocatalytic activity comparison</b> .....                                               | <b>8</b>  |
| <b>15. Comprison with other reported NRR catalysts</b> .....                                        | <b>9</b>  |
| <b>Reference</b> .....                                                                              | <b>10</b> |

## 1. Material characterizations

The crystal phase of the materials was analysed by an X-ray diffractometer (XRD, Rigaku D/max 2500). The morphologies of the samples were examined by Helios FIB SEM at 10.0 kV. Transmission electron microscopy (TEM, H-800 microscope, Hitachi, Japan) instruments carried with energy dispersive X-ray spectroscopy (EDS). X-ray photoelectron spectroscopy (XPS) was used for analyze the surface chemical composition of the materials.

### 1.1 Preparation of Ni(OH)<sub>2</sub> and vanadium doped Ni(OH)<sub>2</sub> (VNOH)

The vanadium doped Ni(OH)<sub>2</sub> (VNOH) was prepared successfully via a simple one-step hydrothermal method. Firstly, 1.4 mmol urea (CH<sub>4</sub>N<sub>2</sub>O) and 0.01 mmol trisodium citrate (C<sub>6</sub>H<sub>5</sub>O<sub>7</sub>Na<sub>3</sub>·2H<sub>2</sub>O) were dissolved in 40 mL deionized water (DI) to form the mixed solution. Then, 0.24 mmol ammonium metavanadate (NH<sub>4</sub>VO<sub>3</sub>) and 0.96 mmol nickel nitrate (NiNO<sub>3</sub>·6H<sub>2</sub>O) (with the V/Ni ratio of about 1/4) were added into the solution to form pre-reaction liquid with the magnetic stirring, which was then transferred to 50 mL Teflon-lined stainless steel autoclave, and kept at 150 °C for 24 h. After it was naturally cooling to the room temperature, the as-prepared product was washed and dried under vacuum at 60 °C for about 6 h. For better comparison, a series VNOH precursors were synthesized according to the above mentioned method with the V/Ni ratios being 1/2, 1/5, 1/ 6 and 1/8, respectively. Meanwhile, the pure Ni(OH)<sub>2</sub> was synthesized as well via the above method, except that no NH<sub>4</sub>VO<sub>3</sub> being added.

### 1.2 Preparation of NiS<sub>2</sub> and pure V-doped NiS<sub>2</sub>

The pure NiS<sub>2</sub> and V-doped NiS<sub>2</sub> were synthesized via the high temperature annealing treatment, with thiourea (CH<sub>4</sub>N<sub>2</sub>S) being adopted as the sulfur source. In detail, 0.8 g CH<sub>4</sub>N<sub>2</sub>S and 50 mg Ni(OH)<sub>2</sub> or VNOH precursor were put at the upstream and downstream in the tube furnace, respectively. The nitrogen gas was adopted as the carrier gas. Then, the samples were annealed at 350 °C for 3 h.

### 1.3 Preparation of the electrode

The as synthesized NiS<sub>2</sub> or V-NiS<sub>2</sub> catalyst (5 mg) and the 0.5% Nafion solution (5 μL ) were dispersed in the 1 mL specially-made solution ( $V_{water}:V_{ethanol}=1:1$ ), which was then ultrasonicated for 1 h to get a well dispersed catalyst ink. Then, 20 μL of the homogeneous ink was loaded onto a carbon paper electrode with an area of 1×1 cm<sup>2</sup> and dried under ambient conditions.

### 1.4 Electrochemical measurements

The electrocatalytic nitrogen reduction was carried out using a three-electrode system, which include the prepared electrode, carbon rod and Ag/AgCl electrode, respectively. The whole experiments were in the two-compartment cell and separated by the Nafion 211 membrane under the ambient temperature and pressure. The electrochemical tests were carried out in the 0.1 M HCl

solution.

### 1.5 Determination of NH<sub>3</sub>

The indophenol blue method was adopted to quantify the quantity of NH<sub>3</sub> in 0.1 M HCl solution via spectrophotometrically. To produce the calibration curve, for the first step, 1.0 µg mL<sup>-1</sup> NH<sub>4</sub><sup>+</sup> solution in 0.1 M HCl was prepared used NH<sub>4</sub>Cl as raw material, then, it was diluted to a series concentrations (0, 0.1, 0.2, 0.3, 0.4, 0.5, 0.6, 0.6, 0.8, 0.9, 1.0 µg mL<sup>-1</sup>) using 0.1 M HCl. Take 2 mL reference solution in glass bottle for next color reaction. Next, for the color reaction, 2 mL of 1.0 M NaOH solution (containing 5 wt % salicylic acid and 5 wt % sodium citrate) was added in to 2 mL reference solution in a glass bottle, followed by 1 mL of 0.05 M sodium hypochlorite and 200 µL of 1 wt % sodium nitroferricyanide was also added. After two hours under avoid light, the pure 0.1 M HCl solution was used as calibration. The absorbance at λ=655 nm was collected and plotted (**Figure S8**). The measurement method of the electrolyte of electrolysis for two hours was similar with the above method. The plotting of calibration curve in 0.1 M HCl condition is obtained as well.

### 1.6 Determination of hydrazine hydrate

The N<sub>2</sub>H<sub>4</sub> concentration was recorded by the Watt and Chrisp method. The color developing agent was the mixture of of Para-(dimethylamino) benzaldehyde (5.99 g), HCl (12 M, 30 mL) and ethanol (300 mL). To get the standard curve, a series of 5 mL standard solutions (0, 0.1, 0.2, 0.3, 0.4, 0.5, 0.6, 0.7, 0.8, 0.9, 1.0 µg mL<sup>-1</sup>) were added with the color reagent (5 mL) and then were placed in the dark environment (20 min). The background correction was carried out using the 0.1 M HCl solution. The absorbance of the reaction liquids was measured at λ=455 nm, and plotted the fitted curve, which showed a good linear relation of the absorbance with the N<sub>2</sub>H<sub>4</sub> concentration ( $y=0.0426+0.710x$ , **Figure S10**).

### 1.7 Calculation of NH<sub>3</sub> yield

$$\text{NH}_3 \text{ yield}=(c_{\text{NH}_3}\times V)/t\times m$$

Where  $c_{\text{NH}_3}$  is calculated NH<sub>3</sub> concentration, V is the volume of the electrolyte in the electrolytic tank (50 mL), t is reaction time (2 h), m is the catalyst mass (mg).

### 1.8 Calculation of Faradaic Efficiency (FE)

According to the standard curve, the concentrations of NH<sub>3</sub> and NH<sub>4</sub><sup>+</sup> were calculated as follows:

$$\text{FE}=3\times F\times c_{\text{NH}_3}\times V/Q\times 1000000$$

Where F is the Faradaic constant, Q is the quantity of applied electricity.

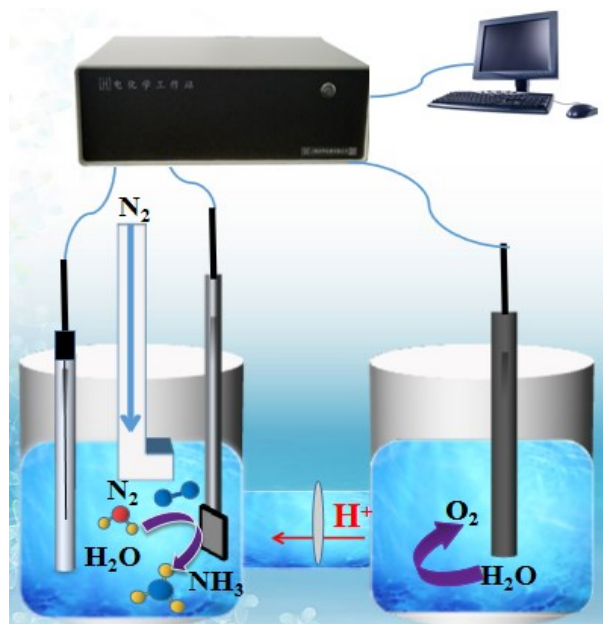

**Figure S1.** Schematic to illustrate the electrocatalytic setup of V-doped  $NiS_2$  for NRR.

## 2. XRD spectra of precursor

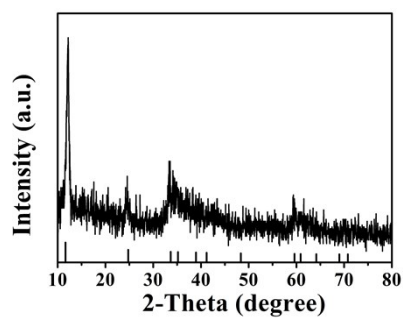

**Figure S2.** XRD spectra of precursor.

## 3. XRD spectra of pure $NiS_2$

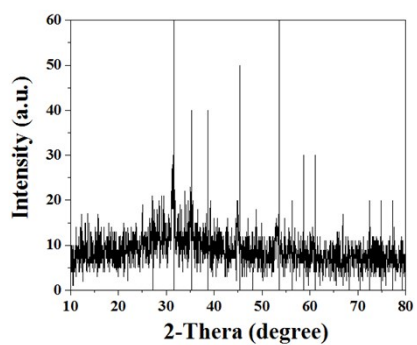

**Figure S3.** XRD spectra of pure NiS<sub>2</sub>

**4. XPS survey of V<sub>0.2</sub>Ni<sub>0.8</sub>S<sub>2</sub>**

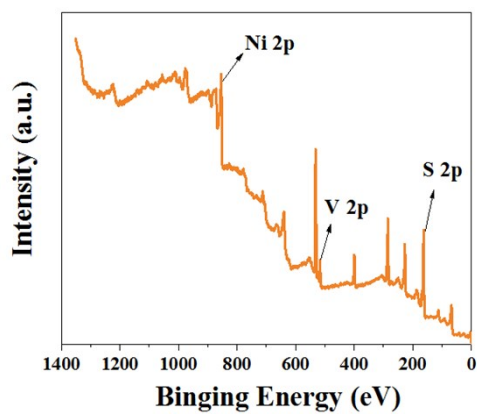

**Figure S4.** Survey XPS spectral of V<sub>0.2</sub>Ni<sub>0.8</sub>S<sub>2</sub>.

**5. SEM image of precursor**

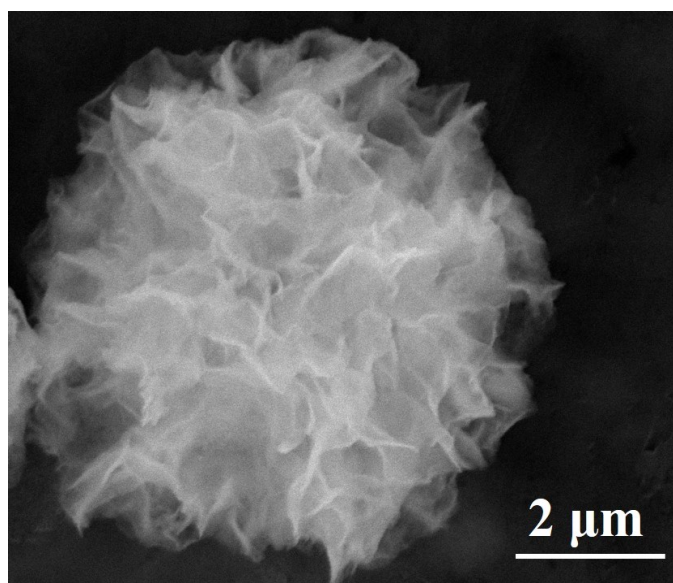

**Figure S5.** SEM image of precursor.

## 6. SEM images of pure NiS<sub>2</sub>

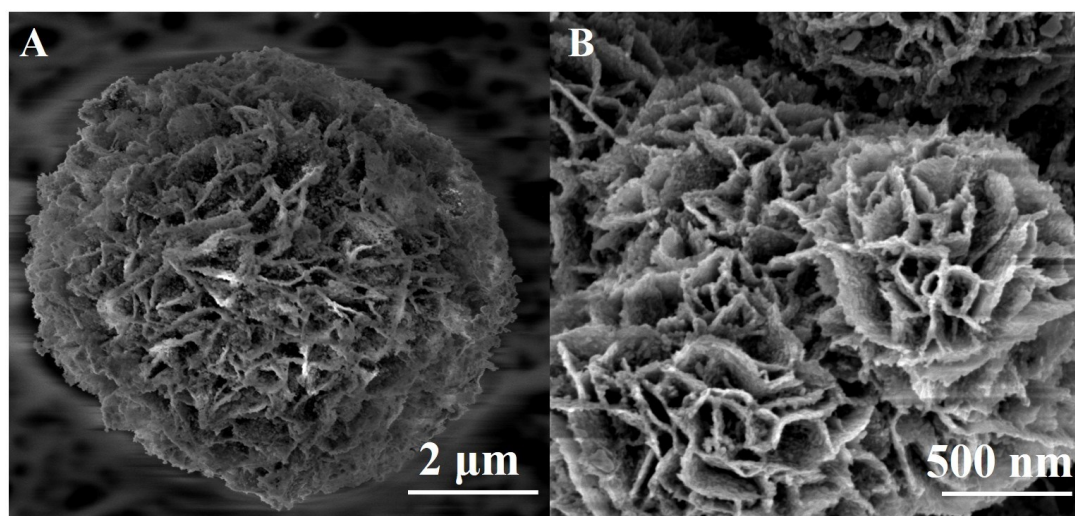

Figure S6. (A) Low- and (B) High-magnification SEM images of pure NiS<sub>2</sub>.

## 7. BET images of pure NiS<sub>2</sub> and V<sub>0.2</sub>Ni<sub>0.8</sub>S<sub>2</sub>

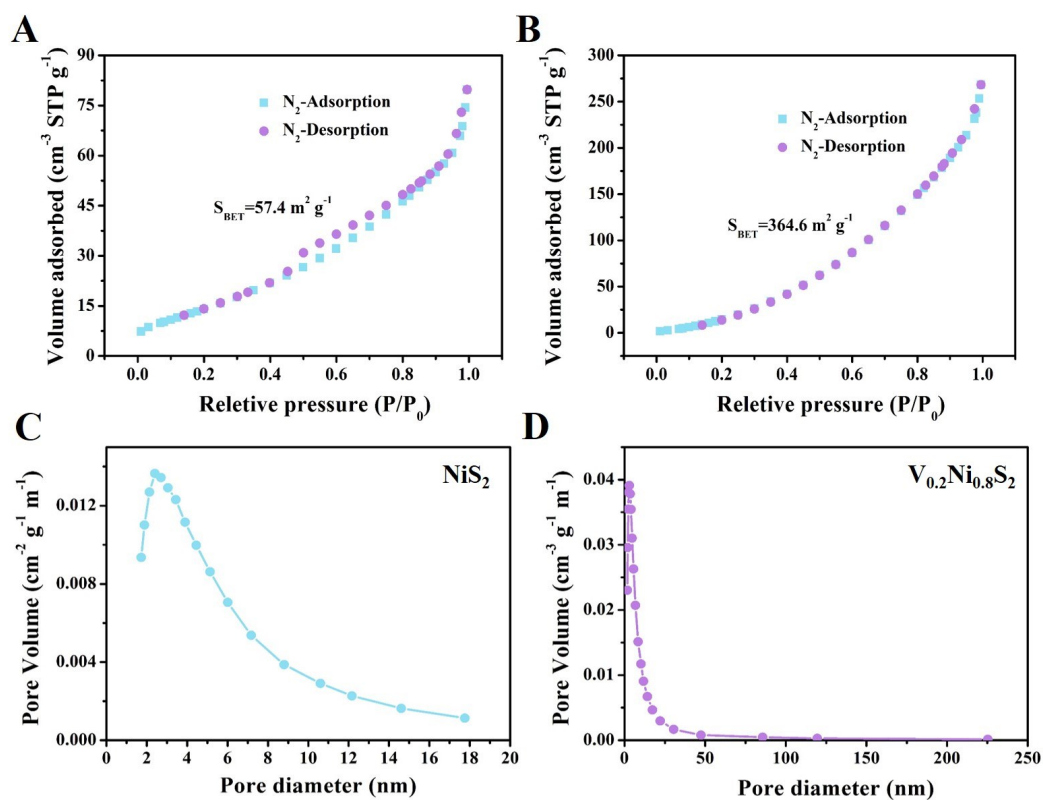

Figure S7. Nitrogen adsorption-desorption isotherms of (A) NiS<sub>2</sub> as well as (B) V<sub>0.2</sub>Ni<sub>0.8</sub>S<sub>2</sub>. Pore size distribution profile of (C) NiS<sub>2</sub> and (D) V<sub>0.2</sub>Ni<sub>0.8</sub>S<sub>2</sub>.

| Materials                                         | BET specific surface area / m <sup>2</sup> g <sup>-1</sup> | BJH average pore diameter / nm | BJT pore volume / cm <sup>3</sup> g <sup>-1</sup> |
|---------------------------------------------------|------------------------------------------------------------|--------------------------------|---------------------------------------------------|
| V <sub>0.2</sub> Ni <sub>0.8</sub> S <sub>2</sub> | 364.6                                                      | 6.79                           | 0.4159                                            |
| NiS <sub>2</sub>                                  | 57.4                                                       | 4.56                           | 0.1236                                            |

**Table S1.** BET specific surface area and BJH pore volume of V<sub>0.2</sub>Ni<sub>0.8</sub>S<sub>2</sub> and NiS<sub>2</sub>.

## 8. EDS spectrum of V<sub>0.2</sub>Ni<sub>0.8</sub>S<sub>2</sub>

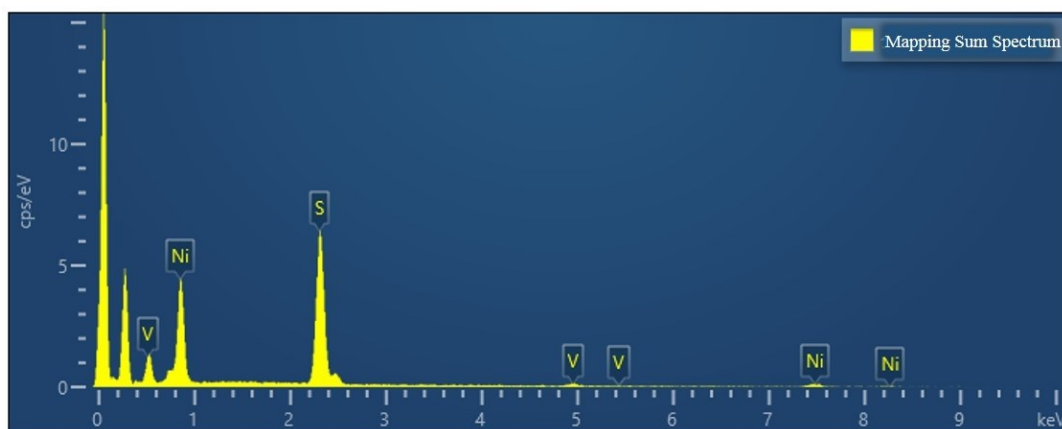

**Figure S8.** EDS spectrum of V<sub>0.2</sub>Ni<sub>0.8</sub>S<sub>2</sub>.

## 9. Gas-tight-two-compartment cell for NRR

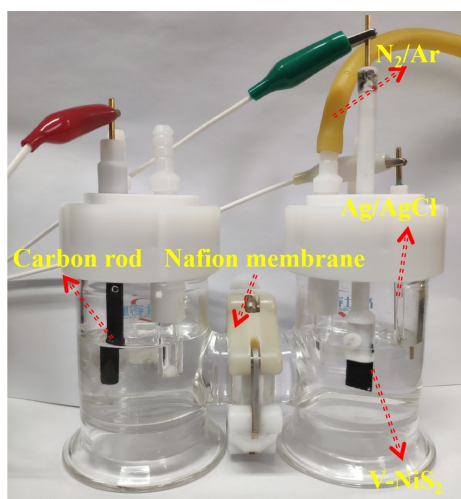

**Figure S9.** Gas-tight-two-compartment cell for NRR.

## 10. Standard curve of $\text{NH}_3$

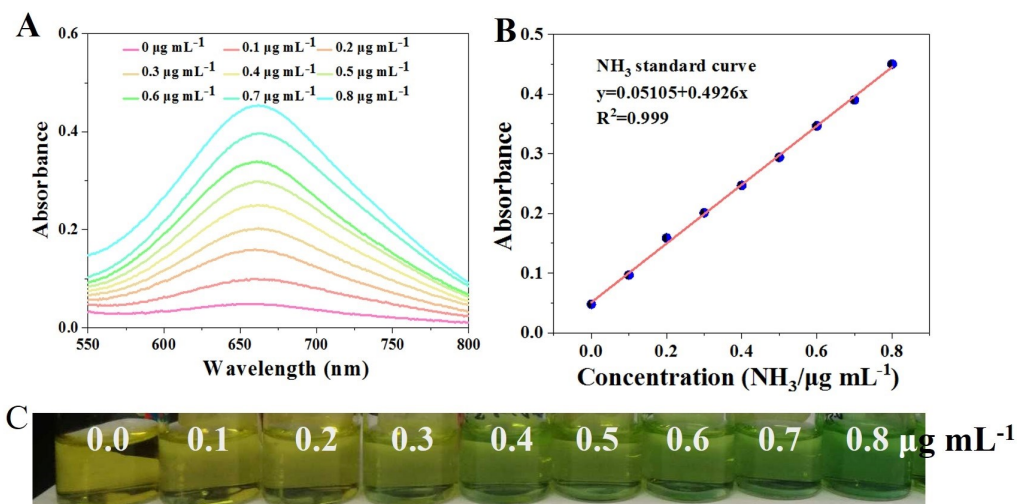

**Figure S10.** (A) UV-vis absorption spectrums of standard solutions with different  $\text{NH}_4^+$  concentration. (B) Standard curve from the  $\text{NH}_4^+$  concentration. (C) The chromogenic reaction of indophenol indicator with  $\text{NH}_4^+$  of different concentration.

## 11. UV-vis absorption spectrums of all contrast experiments

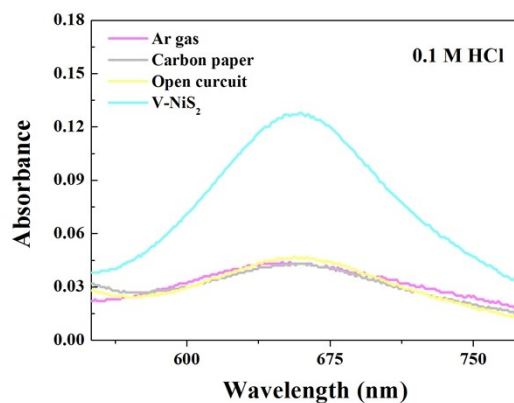

**Figure S11.** UV-vis absorption spectrums of all contrast experiments including Ar as feed gas, clear carbon paper as working electrode and open circuit.



## 12. Standard curve of N<sub>2</sub>H<sub>4</sub>

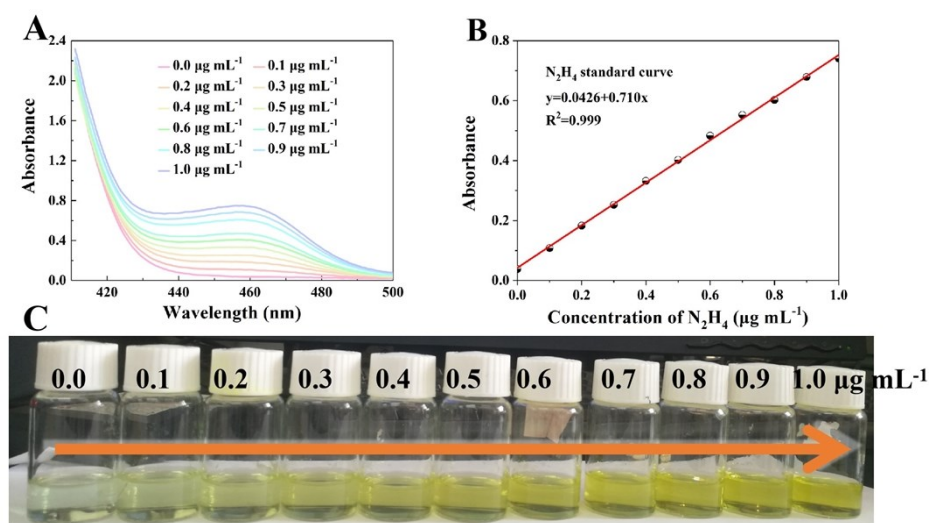

**Figure S12.** (A) UV-vis curves of a series of N<sub>2</sub>H<sub>4</sub> concentrations after 20 min. (b) Standard curve for the estimation of the concentration of N<sub>2</sub>H<sub>4</sub>. (C) The chromogenic reaction with corresponding N<sub>2</sub>H<sub>4</sub> concentrations.

## 13. UV-vis spectrum and corresponding N<sub>2</sub>H<sub>4</sub> yield

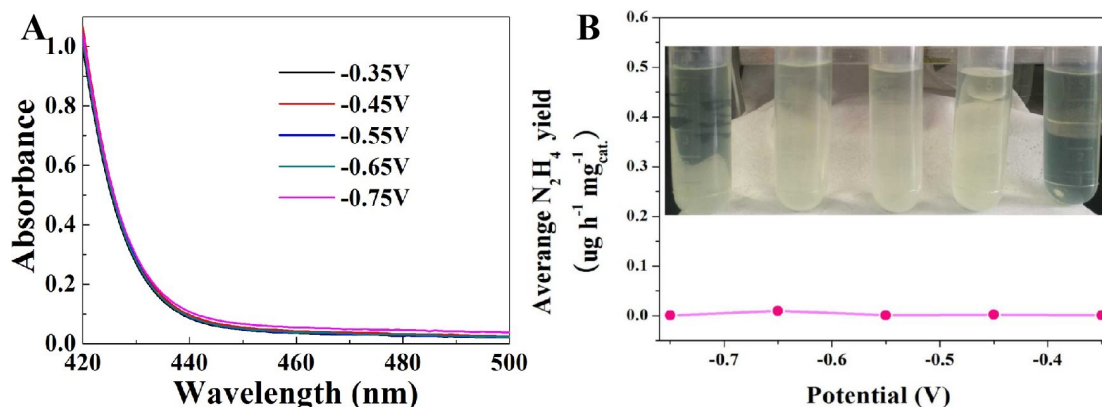

**Figure S13.** (A) UV-vis curves of V<sub>0.2</sub>Ni<sub>0.8</sub>S<sub>2</sub> at every potential to detect by-product. (B) Corresponding yield at all potentials, inset: the chromogenic reaction of every potential.

## 14. Electrocatalytic activity comparison

| Material                                            | NH <sub>3</sub> yield/µg h <sup>-1</sup> mg <sup>-1</sup> cat. | FE    |
|-----------------------------------------------------|----------------------------------------------------------------|-------|
| NiS <sub>2</sub>                                    | 5.8                                                            | 0.5 % |
| V <sub>0.34</sub> Ni <sub>0.66</sub> S <sub>2</sub> | 21.583                                                         | 2.9 % |

|                        |        |       |
|------------------------|--------|-------|
| $V_{0.17}Ni_{0.83}S_2$ | 38.259 | 6.7 % |
| $V_{0.14}Ni_{0.86}S_2$ | 29.921 | 4.2 % |
| $V_{0.11}Ni_{0.89}S_2$ | 24.795 | 3.5 % |

**Table S2.** Summary of all catalysts for NRR at 0.1 M HCl solution.

## 15. Comparison with other reported NRR catalysts

| Material                                                        | Electrolyte                           | NH <sub>3</sub> yield/ $\mu\text{g h}^{-1} \text{mg}^{-1} \text{cat.}$ | FE     | Potential/V |
|-----------------------------------------------------------------|---------------------------------------|------------------------------------------------------------------------|--------|-------------|
| This work                                                       | 0.1 M HCl                             | 47.64                                                                  | 9.70 % | -----       |
| Mo <sub>2</sub> N nanorod <sup>1</sup>                          | 0.1 M HCl                             | 78.4                                                                   | 4.50 % | -0.3        |
| Defect-Rich MoS <sub>2</sub> Nanoflower <sup>2</sup>            | 0.1 M Na <sub>2</sub> SO <sub>4</sub> | 29.28                                                                  | 8.34 % | -0.4        |
| Fe-Ni <sub>2</sub> P nanosheets <sup>3</sup>                    | 0.1 M HCl                             | 88.51                                                                  | 7.92 % | -0.3        |
| Fe <sub>2</sub> O <sub>3</sub> nanorod <sup>4</sup>             | 0.1 M Na <sub>2</sub> SO <sub>4</sub> | 6.78                                                                   | 7.69 % | -0.4        |
| Mn <sub>3</sub> O <sub>4</sub> nanocube <sup>5</sup>            | 0.1 M Na <sub>2</sub> SO <sub>4</sub> | 11.6                                                                   | 3.0 %  | -0.8        |
| Sn/SnS <sub>2</sub> nanosheets <sup>6</sup>                     | 0.1 M NaOH                            | 23.8                                                                   | 6.5 %  | -----       |
| Nb <sub>2</sub> O <sub>5</sub> nanofiber <sup>7</sup>           | 0.1 M HCl                             | 43.6                                                                   | 9.26 % | -0.55       |
| Co <sub>3</sub> O <sub>4</sub> @NCs <sup>8</sup>                | 0.05 M H <sub>2</sub> SO <sub>4</sub> | 42.58                                                                  | 8.5 %  | -0.2        |
| P-CNTs <sup>9</sup>                                             | 0.25 M LiClO <sub>4</sub>             | 24.4                                                                   | 12.5 % | -----       |
| CaCoOx <sup>10</sup>                                            | 0.5 M Na <sub>2</sub> SO <sub>4</sub> | 16.25                                                                  | 20.51  | -0.3        |
| CoS nano-flowers <sup>11</sup>                                  | 0.05 M H <sub>2</sub> SO <sub>4</sub> | 16.5                                                                   | 12.1   | -0.15       |
| Two-dimensional vanadium carbide <sup>12</sup>                  | 0.1 M HCl                             | 23.2                                                                   | 18.3   | -0.1        |
| CrN nanocube <sup>13</sup>                                      | 0.1 M HCl                             | 31.11                                                                  | 16.6   | -0.5        |
| Boron, nitrogen and fluorine ternary-doped carbon <sup>14</sup> | 0.05 M H <sub>2</sub> SO <sub>4</sub> | 41                                                                     | 14     | -0.4        |

**Table S3.** Comparison between  $V_{0.2}Ni_{0.8}S_2$  with some other reported NRR catalysts.

## References

1. X. Ren, G. Cui, L. Chen, F. Xie, Q. Wei, Z. Tian and X. Sun, Electrochemical N<sub>2</sub> fixation to NH<sub>3</sub> under ambient conditions: Mo<sub>2</sub>N nanorod as a highly efficient and selective catalyst. *Chem Commun (Camb)*, 2018, **54**, 8474-8477.
2. X. Li, T. Li, Y. Ma, Q. Wei, W. Qiu, H. Guo, X. Shi, P. Zhang, A. M. Asiri, L. Chen, B. Tang and X. Sun, Boosted Electrocatalytic N<sub>2</sub> Reduction to NH<sub>3</sub> by Defect-Rich MoS<sub>2</sub> Nanoflower, *Adv. Energy Mater.*, 2018, **8**.
3. C. Guo, X. Liu, L. Gao, X. Kuang, X. Ren, X. Ma, M. Zhao, H. Yang, X. Sun and Q. Wei, Fe-doped Ni<sub>2</sub>P nanosheets with porous structure for electroreduction of nitrogen to ammonia under ambient conditions, *Appl. Catal. B-Environ.*, 2020, **263**.
4. Z. Wang, K. Zheng, S. Liu, Z. Dai, Y. Xu, X. Li, H. Wang and L. Wang, Interconnected

- porous composites electrode materials of Carbon@Vanadium nitride by directly absorbing VO<sub>3</sub>, *ACS Sustain. Chem. Eng.*, 2019, **7**, 11754-11759.
5. X. Wu, L. Xia, Y. Wang, W. Lu, Q. Liu, X. Shi and X. Sun, Mn<sub>3</sub>O<sub>4</sub> Nanocube: An Efficient Electrocatalyst Toward Artificial N<sub>2</sub> Fixation to NH<sub>3</sub>, *Small*, 2018, **14**, e1803111.
  6. P. Li, W. Fu, P. Zhuang, Y. Cao, C. Tang, A. B. Watson, P. Dong, J. Shen and M. Ye, Amorphous Sn/Crystalline SnS<sub>2</sub> Nanosheets via In Situ Electrochemical Reduction Methodology for Highly Efficient Ambient N<sub>2</sub> Fixation, *Small*, 2019, **15**, e1902535.
  7. J. Han, Z. Liu, Y. Ma, G. Cui, F. Xie, F. Wang, Y. Wu, S. Gao, Y. Xu and X. Sun, Ambient N<sub>2</sub> fixation to NH<sub>3</sub> at ambient conditions: Using Nb<sub>2</sub>O<sub>5</sub> nanofiber as a high-performance electrocatalyst, *Nano Energy*, 2018, **52**, 264-270.
  8. S. Luo, X. Li, B. Zhang, Z. Luo and M. Luo, *ACS Appl Mater Interfaces*, MOF-Derived Co<sub>3</sub>O<sub>4</sub>@NC with Core-Shell Structures for N<sub>2</sub> Electrochemical Reduction under Ambient Conditions, 2019, **11**, 26891-26897.
  9. L. Yuan, Z. Wu, W. Jiang, T. Tang, S. Niu and J. Hu, Phosphorus-doping Activates Carbon Nanotubes for Efficient Electroreduction of Nitrogen to Ammonia, *Nano Res.*, 2020, **13**, 1376-13810.
  10. X. Chen, K. Li, X. Yang, J. Lv, S. Sun, S. Li, D. Cheng, B. Li, Y. Li and H. Zang, Oxygen Vacancy Engineering of Calcium Cobaltate: A Nitrogen Fixation Electrocatalyst at Ambient Condition in Neutral Electrolyte, *Nano Res.* 2021, **14**, 501-506.
  11. C. Li, R Xu, S Ma, Y Xie, K. Qu, H. Bao, W. Cai, Z. Yang, Sulfur vacancies in ultrathin cobalt sulfide nanoflowers enable boosted electrocatalytic activity of nitrogen reduction reaction, *Chen. Eng. J.*, 2020, **415**, 129018.
  12. C. Zhang, D. Wang, Y. Wan, R. Lv, S. Li, B. Li, X. Zou, S. Yang, Vanadium carbide with periodic anionic vacancies for effective electrocatalytic nitrogen reduction, *Mater. Today*, 2020, **40**, 15-18.
  13. Z. Ma, J. Chen, D. Luo, Thomas T., Richard D. and Adam S. Structural evolution of CrN nanocube electrocatalysts during nitrogen reduction reaction, *Nanoscale*, 2020, **12**, 19276-19283.
  14. Q. Zhang, F. Luo, Y. Ling, S. Xiao, M. Li, K. Qu, Y. Wang, Ji. Xu, W. Cai and Z. Yang. Identification of functionality of heteroatoms in boron, nitrogen and fluorine ternary-doped carbon as a robust electrocatalyst for nitrogen reduction reaction powered by rechargeable zinc-air batteries, *J. Mater. Chem. A*, 2020, **8**, 8430-8439.
